# Supplementary material for: Natural Oscillatory Frequency Slowing in the Premotor Cortex of Early-Course Schizophrenia Patients: A TMS-EEG Study
Source: MDPI journal article supplement (doi:10.3390/brainsci13040534), 2023-03-24

## Supplementary material

**Table S1**

**Summary of TMS-EEG measures.** Means and SDs of Natural Frequency, Global and Local Mean Field Powers (GMFP and LMFP), and Event-Related Spectral Perturbation (ERSP) values (calculated both in a local ROI and across all channels) are reported for both groups, alongside the p values after Wilcoxon rank-sum test. Alpha: 8-12 Hz; beta: 13-30 Hz; gamma: 30-45 Hz. HC: healthy controls; ECSCZ: early-course schizophrenia patients.

|                         | HC           | ECSCZ        | p val  |
|-------------------------|--------------|--------------|--------|
| Natural Frequency       | 29.15 ± 6.59 | 23.27 ± 4.27 | 0.0186 |
| GMFP                    | 0.77 ± 0.69  | 0.61 ± 0.43  | 0.6375 |
| LMFP                    | 0.92 ± 0.91  | 0.56 ± 0.42  | 0.2662 |
| ERSP (all freq, global) | 0.53 ± 0.55  | 0.43 ± 0.30  | 0.8950 |
| ERSP (all freq, local)  | 1.11 ± 0.96  | 0.77 ± 0.71  | 0.1935 |
| ERSP (alpha global)     | 0.57 ± 1.02  | 0.13 ± 0.30  | 0.1365 |
| ERSP (alpha local)      | 1.07 ± 1.62  | 0.23 ± 0.57  | 0.1177 |
| ERSP (beta global)      | 0.58 ± 0.60  | 0.50 ± 0.40  | 0.9849 |
| ERSP (beta local)       | 1.23 ± 1.05  | 0.95 ± 0.92  | 0.3757 |
| ERSP (gamma global)     | 0.45 ± 0.36  | 0.43 ± 0.26  | 0.5591 |
| ERSP (gamma local)      | 0.92 ± 0.60  | 0.70 ± 0.52  | 0.2827 |

**Figure S1**

**Global Mean Field Power – group comparison.** Figure shows grand averages of the Global Mean Field Power (GMFP, top) for healthy controls (blue) and early-course schizophrenia patients (red). Bottom panel shows group comparisons for 50ms time bins. No significant differences were found for any time bin (Wilcoxon rank-sum tests,  $\alpha < 0.05$ , uncorrected).

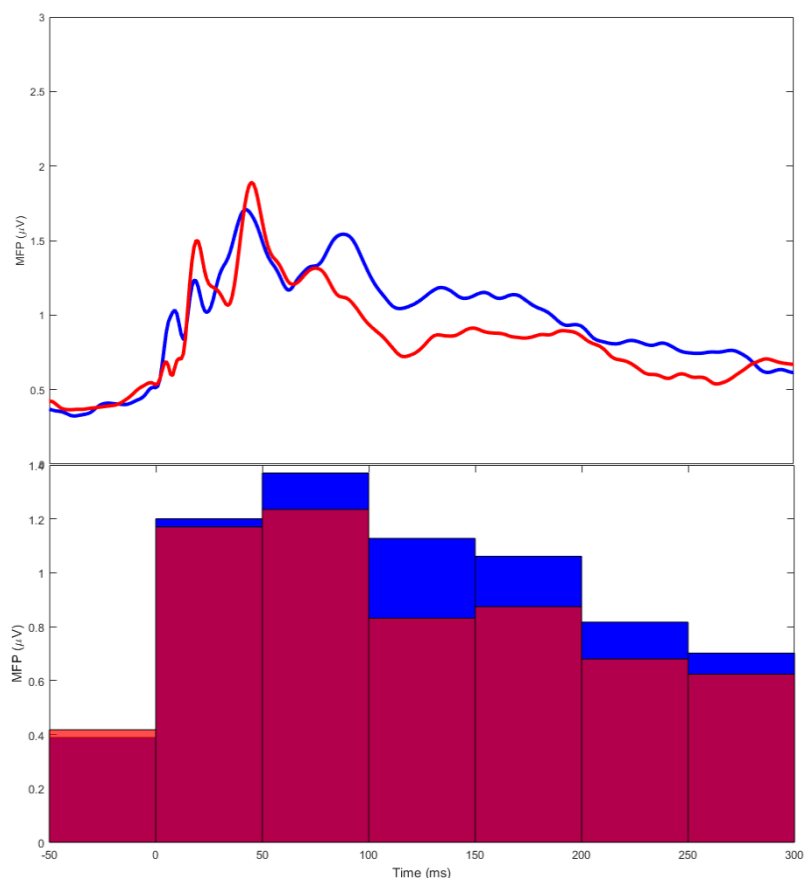

**Figure S2**

**Local Mean Field Power – group comparison.** Same as Figure S1 but limited to a cluster of electrodes close to the stimulation site (i.e., Local MFP, LMFP). No significant differences were found for any time bin (Wilcoxon rank-sum tests,  $\alpha < 0.05$ , uncorrected).

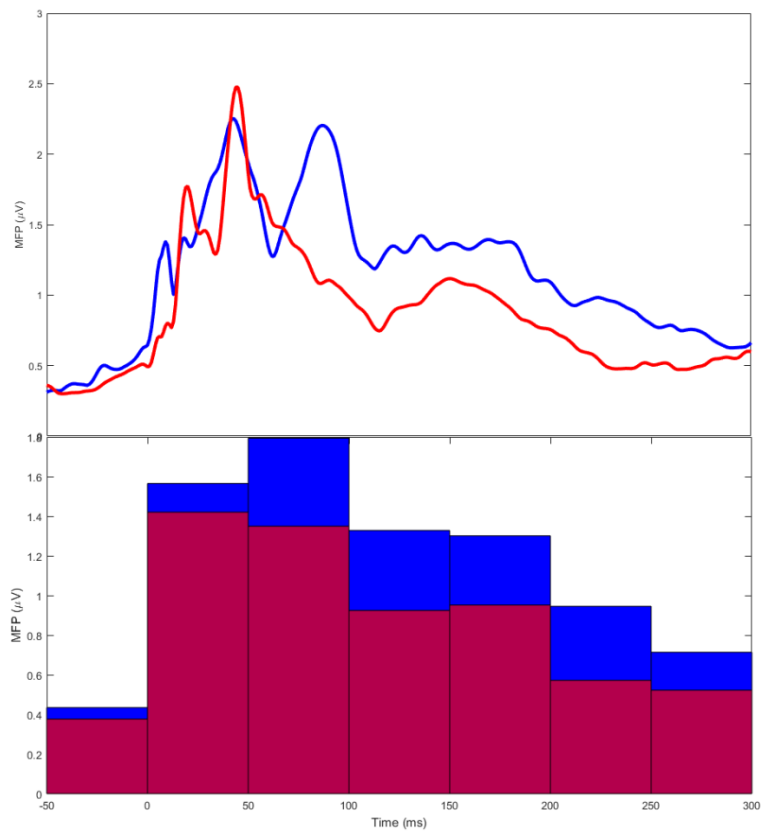

Supplement: s1 [file s1]
